# Supplementary material for: Estrone removal by horseradish peroxidase immobilized on a nanofibrous support with Fe3O4 nanoparticles
Source: Royal Society of Chemistry journal article supplement (doi:10.1039/c5ra22805k), 2016-01-01
Supplement: c5ra22805k1.pdf [file c5ra22805k1.pdf]

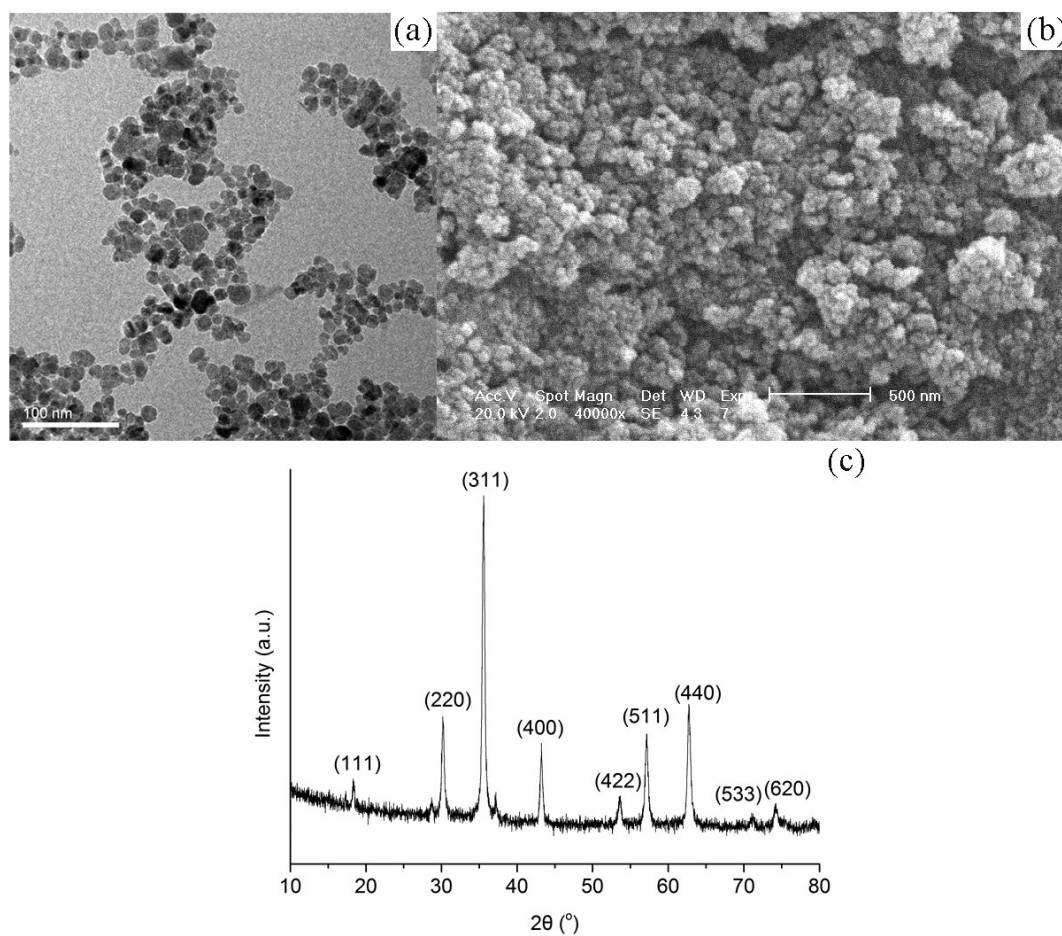

Figure S1 (a) TEM and (b) SEM images and (c) XRD pattern of Fe<sub>3</sub>O<sub>4</sub> NPs

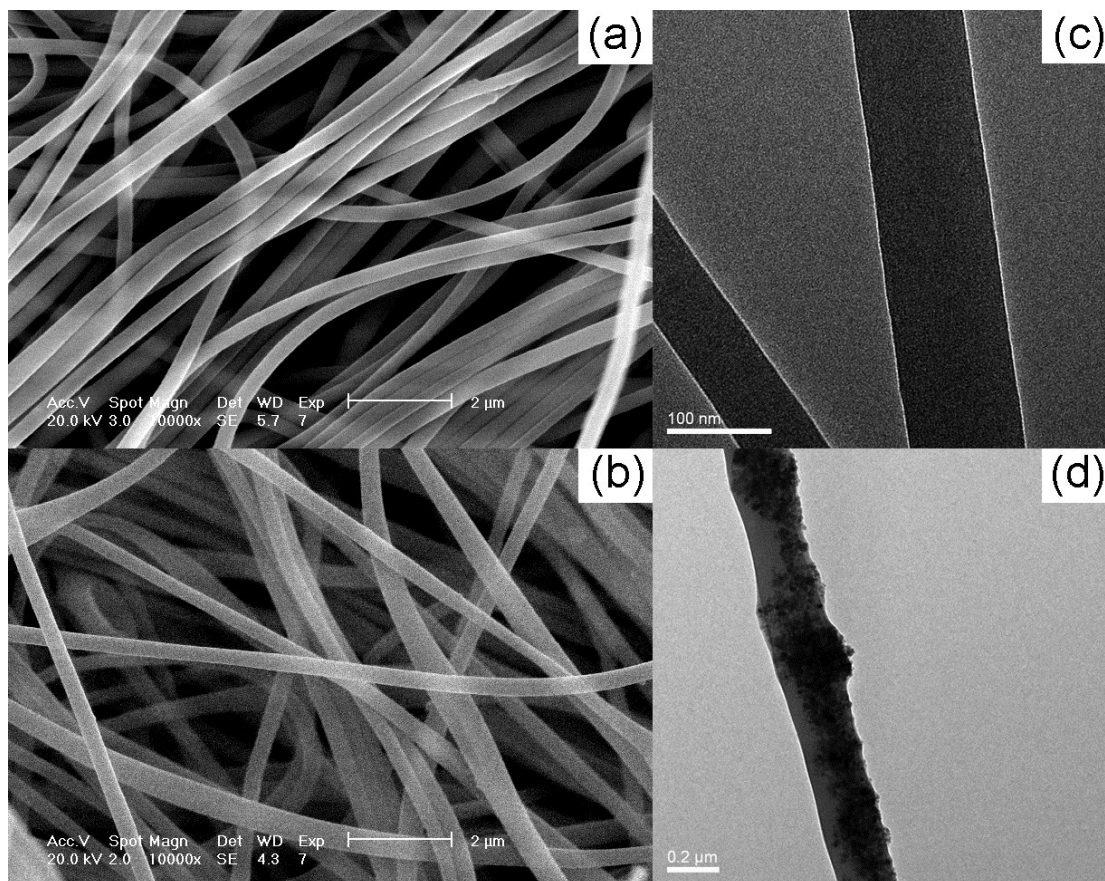

Figure S2 SEM images of (a) NFM and (b) Fe<sub>3</sub>O<sub>4</sub> NPs/NFM; and TEM images of (c)

NFM, and (d) Fe<sub>3</sub>O<sub>4</sub> NPs/NFM

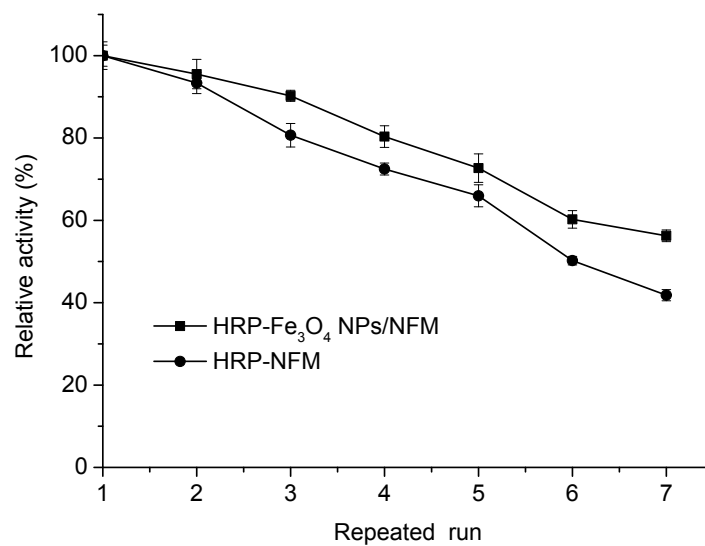

Figure S3 Reusability of HRP-NFM and HRP-Fe<sub>3</sub>O<sub>4</sub> NPs/NFM

Table S1 Experimental design levels of chosen variables

| Variables                                                | Levels in Box–Behnken design |            |           |
|----------------------------------------------------------|------------------------------|------------|-----------|
| Coded level                                              | Low (-1)                     | Middle (0) | High (+1) |
| pH                                                       | 3                            | 6          | 9         |
| Temperature (°C)                                         | 20                           | 35         | 50        |
| H <sub>2</sub> O <sub>2</sub> initial concentration (mM) | 0.01                         | 0.05       | 0.1       |

Table S2 Experimental and predicted values

| Std. run<br>order | pH | T  | C <sub>H2O2</sub> | Y <sup>1</sup>         |                        |                        |                        |                                               |                        |
|-------------------|----|----|-------------------|------------------------|------------------------|------------------------|------------------------|-----------------------------------------------|------------------------|
|                   |    |    |                   | Free HRP               |                        | HRP-NFM                |                        | HRP-Fe <sub>3</sub> O <sub>4</sub><br>NPs/NFM |                        |
|                   |    |    |                   | <i>Y<sub>exp</sub></i> | <i>Y<sub>pre</sub></i> | <i>Y<sub>exp</sub></i> | <i>Y<sub>pre</sub></i> | <i>Y<sub>exp</sub></i>                        | <i>Y<sub>pre</sub></i> |
|                   |    |    |                   |                        |                        |                        |                        |                                               |                        |
| 1                 | 3  | 20 | 0.05              | 13.08                  | 12.89                  | 5.74                   | 5.70                   | 11.92                                         | 11.88                  |
| 2                 | 9  | 20 | 0.05              | 4.38                   | 4.45                   | 6.04                   | 6.00                   | 13.4                                          | 13.52                  |
| 3                 | 3  | 50 | 0.05              | 11.64                  | 11.58                  | 8.56                   | 8.60                   | 12.17                                         | 12.04                  |
| 4                 | 9  | 50 | 0.05              | 3.39                   | 3.58                   | 6.48                   | 6.52                   | 13.82                                         | 13.86                  |
| 5                 | 3  | 35 | 0.01              | 13.53                  | 13.92                  | 7.04                   | 7.01                   | 12.95                                         | 12.91                  |
| 6                 | 9  | 35 | 0.01              | 3.95                   | 4.09                   | 4.0                    | 3.98                   | 13.81                                         | 13.60                  |
| 7                 | 3  | 35 | 0.1               | 11.45                  | 11.31                  | 4.04                   | 4.06                   | 11.30                                         | 11.50                  |
| 8                 | 9  | 35 | 0.1               | 5.10                   | 4.70                   | 5.27                   | 5.30                   | 14.23                                         | 14.26                  |
| 9                 | 6  | 20 | 0.01              | 11.62                  | 11.41                  | 6.32                   | 6.39                   | 14.75                                         | 14.83                  |
| 10                | 6  | 50 | 0.01              | 10.07                  | 9.74                   | 8.48                   | 8.47                   | 14.76                                         | 14.92                  |

<sup>1</sup> Y<sub>exp</sub> and Y<sub>pre</sub> are experimental and predicted responses.

|    |   |    |      |       |       |       |       |       |       |
|----|---|----|------|-------|-------|-------|-------|-------|-------|
| 11 | 6 | 20 | 0.1  | 9.50  | 9.83  | 5.92  | 5.94  | 14.45 | 14.29 |
| 12 | 6 | 50 | 0.1  | 9.11  | 9.32  | 7.34  | 7.28  | 14.79 | 14.71 |
| 13 | 6 | 35 | 0.05 | 13.92 | 13.81 | 11.85 | 11.79 | 13.53 | 13.38 |
| 14 | 6 | 35 | 0.05 | 13.73 | 13.81 | 11.97 | 11.79 | 13.41 | 13.38 |
| 15 | 6 | 35 | 0.05 | 13.95 | 13.81 | 11.09 | 11.79 | 13.5  | 13.38 |
| 16 | 6 | 35 | 0.05 | 13.93 | 13.81 | 12.00 | 11.79 | 13.54 | 13.38 |
| 17 | 6 | 35 | 0.05 | 13.53 | 13.81 | 11.90 | 11.79 | 12.9  | 13.38 |

---
